# Supplementary material for: Bacteriobiota and Chemical Changes during the Ripening of Traditional Fermented “Pirot ‘Ironed’ Sausage”
Source: MDPI journal article supplement (doi:10.3390/foods12030664), 2023-02-03
Supplement: s1 [file s1]

# Bacteriobiota and Chemical Changes during the Ripening of Traditional Fermented “Pirot ‘Ironed’ Sausage”

Svetlana Bogdanović <sup>1</sup>, Slaviša Stanković <sup>2</sup>, Tanja Berić <sup>2</sup>, Igor Tomasevic <sup>3,4,\*</sup>, Volker Heinz <sup>4</sup>, Nino Terjung <sup>4</sup> and Ivica Dimkić <sup>2,\*</sup>

<sup>1</sup> Agriculture and Food College of Applied Studies, Ćirila i Metodija 1, 18400 Prokuplje, Serbia

<sup>2</sup> Faculty of Biology, University of Belgrade, Studentski trg 16, 11158 Belgrade, Serbia

<sup>3</sup> Faculty of Agriculture, University of Belgrade, Nemanjina 6, 11080 Belgrade, Serbia

<sup>4</sup> DIL German Institute of Food Technologies, Prof.-v.-Klitzing-Str. 7, 49610 Quakenbrueck, Germany

\* Correspondence: tbigor@agrif.bg.ac.rs (I.T.); ivicad@bio.bg.ac.rs (I.D.)

**Citation:** Bogdanović, S.; Stanković, S.; Berić, T.; Tomasevic, I.; Heinz, V.; Terjung, N.; Dimkić, I. Bacteriobiota and Chemical Changes during the Ripening of Traditional Fermented “Pirot ‘Ironed’ Sausage”. *Foods* **2023**, *12*, x. <https://doi.org/10.3390/xxxxx>

Academic Editors: Jasna Mrvčić and Damir Stanzer

Received: 22 December 2022

Revised: 23 January 2023

Accepted: 29 January 2023

Published: 3 February 2023

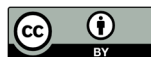

**Copyright:** © 2023 by the authors. Submitted for possible open access publication under the terms and conditions of the Creative Commons Attribution (CC BY) license (<https://creativecommons.org/licenses/by/4.0/>).



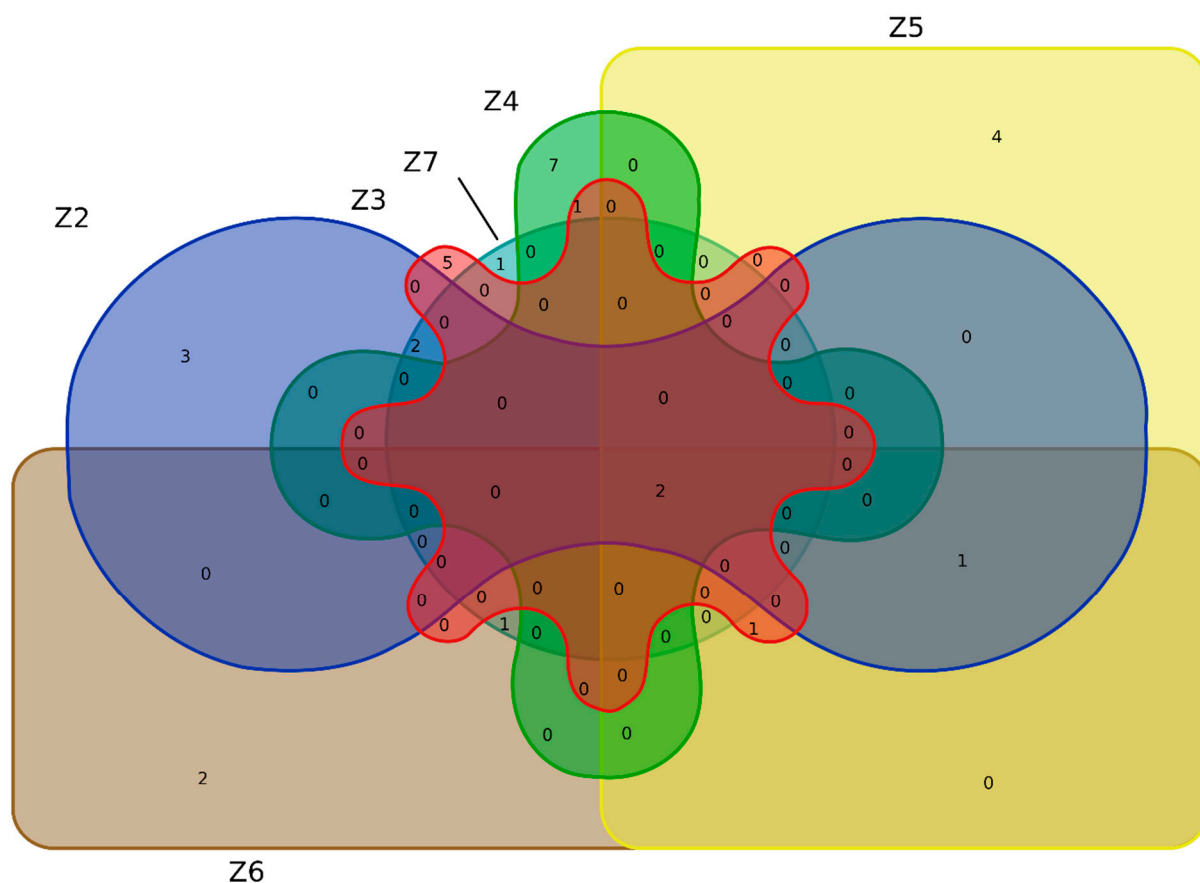

**Figure S2.** Venn diagram of common species between samples (Z2-Z6) throughout the ripening of “Pírot ‘ironed’ sausage”.

**Table S1.** A total number of the reads retention.

| Sample        | Input   | Primer<br>remove | Quality<br>filter | Denoised<br>F | Denoised<br>R | Merged | Chimera<br>remove | Final %<br>of reads |
|---------------|---------|------------------|-------------------|---------------|---------------|--------|-------------------|---------------------|
| Z1            | 169672  | 168669           | 156105            | 154649        | 154959        | 148160 | 127677            | 75.25               |
| Z2            | 127184  | 117614           | 109826            | 109178        | 109328        | 105343 | 96909             | 76.20               |
| Z3            | 148238  | 142399           | 133327            | 132649        | 132808        | 127148 | 114558            | 77.28               |
| Z4            | 107113  | 104776           | 99454             | 98977         | 99092         | 95421  | 86161             | 80.44               |
| Z5            | 166600  | 162465           | 152607            | 151885        | 152033        | 145402 | 128808            | 77.32               |
| Z6            | 189000  | 184973           | 174132            | 173236        | 173503        | 166585 | 146679            | 77.61               |
| Z7            | 145762  | 141171           | 133262            | 132584        | 132710        | 126288 | 108690            | 74.57               |
| Total/average | 1053569 | 1022067          | 958713            | 953158        | 954433        | 914347 | 809482            | 76.95               |

**Table S2.** Homology of the identified OTUs annotated based on the BLAST $n$  best bit score in the NCBI 16S database.

| No.  | Qseq ID | Sseq ID                       | Ident. (%) | Length | E value | Bit score | Species name                        |
|------|---------|-------------------------------|------------|--------|---------|-----------|-------------------------------------|
| 1    | seq_001 | gi 1397641705 ref NR_156814.1 | 100        | 427    | 0       | 789       | <i>Photobacterium carnosum</i>      |
| 16   | seq_004 | gi 1397641705 ref NR_156814.1 | 99.766     | 427    | 0       | 784       |                                     |
| 161  | seq_033 | gi 1397641705 ref NR_156814.1 | 99.766     | 427    | 0       | 784       |                                     |
| 196  | seq_040 | gi 1397641705 ref NR_156814.1 | 99.532     | 427    | 0       | 778       |                                     |
| 216  | seq_044 | gi 1397641705 ref NR_156814.1 | 99.766     | 427    | 0       | 784       |                                     |
| 231  | seq_047 | gi 1397641705 ref NR_156814.1 | 99.532     | 427    | 0       | 778       |                                     |
| 256  | seq_052 | gi 1397641705 ref NR_156814.1 | 99.532     | 427    | 0       | 778       |                                     |
| 336  | seq_068 | gi 1397641705 ref NR_156814.1 | 99.766     | 427    | 0       | 784       |                                     |
| 376  | seq_076 | gi 1397641705 ref NR_156814.1 | 99.532     | 427    | 0       | 778       |                                     |
| 526  | seq_106 | gi 1397641705 ref NR_156814.1 | 99.766     | 427    | 0       | 784       |                                     |
| 531  | seq_107 | gi 1397641705 ref NR_156814.1 | 99.766     | 427    | 0       | 784       |                                     |
| 1176 | seq_236 | gi 1397641705 ref NR_156814.1 | 100        | 418    | 0       | 773       | <i>Photobacterium phosphoreum</i>   |
| 1291 | seq_259 | gi 1397641705 ref NR_156814.1 | 100        | 427    | 0       | 789       |                                     |
| 41   | seq_009 | gi 631252986 ref NR_114184.1  | 100        | 427    | 0       | 789       |                                     |
| 276  | seq_056 | gi 631252986 ref NR_114184.1  | 99.766     | 427    | 0       | 784       | <i>Photobacterium iliopiscarium</i> |
| 56   | seq_012 | gi 631252986 ref NR_114184.1  | 99.766     | 427    | 0       | 784       |                                     |
| 46   | seq_010 | gi 631250795 ref NR_111990.1  | 100        | 427    | 0       | 789       |                                     |
| 51   | seq_011 | gi 631250795 ref NR_111990.1  | 99.766     | 427    | 0       | 784       | <i>Photobacterium piscicola</i>     |
| 151  | seq_031 | gi 631250795 ref NR_111990.1  | 99.532     | 427    | 0       | 778       |                                     |
| 406  | seq_082 | gi 631250795 ref NR_111990.1  | 99.766     | 427    | 0       | 784       |                                     |
| 71   | seq_015 | gi 672239090 ref NR_125679.1  | 100        | 427    | 0       | 789       |                                     |
| 11   | seq_003 | gi 631252623 ref NR_113821.1  | 100        | 427    | 0       | 789       | <i>Lactobacillus sakei</i>          |
| 441  | seq_089 | gi 631252623 ref NR_113821.1  | 99.766     | 427    | 0       | 784       |                                     |
| 446  | seq_090 | gi 631252623 ref NR_113821.1  | 99.766     | 427    | 0       | 784       |                                     |
| 511  | seq_103 | gi 631252623 ref NR_113821.1  | 99.766     | 427    | 0       | 784       |                                     |
| 716  | seq_144 | gi 631252623 ref NR_113821.1  | 99.766     | 427    | 0       | 784       |                                     |
| 1876 | seq_376 | gi 631252623 ref NR_113821.1  | 100        | 427    | 0       | 789       | <i>Lactobacillus algidus</i>        |
| 6    | seq_002 | gi 265678315 ref NR_028617.1  | 100        | 427    | 0       | 789       |                                     |
| 1496 | seq_300 | gi 265678315 ref NR_028617.1  | 96.487     | 427    | 0       | 706       |                                     |
| 1766 | seq_354 | gi 265678315 ref NR_028617.1  | 100        | 427    | 0       | 789       |                                     |
| 1661 | seq_333 | gi 265678315 ref NR_028617.1  | 100        | 420    | 0       | 776       |                                     |
| 121  | seq_025 | gi 343201712 ref NR_042438.1  | 99.766     | 427    | 0       | 784       | <i>Lactobacillus graminis</i>       |
| 366  | seq_074 | gi 343201712 ref NR_042438.1  | 99.532     | 427    | 0       | 778       |                                     |
| 881  | seq_177 | gi 343201712 ref NR_042438.1  | 99.532     | 427    | 0       | 778       |                                     |
| 246  | seq_050 | gi 559795383 ref NR_104976.1  | 100        | 427    | 0       | 789       | <i>Lactobacillus fuchuensis</i>     |
| 616  | seq_124 | gi 672238974 ref NR_125563.1  | 100        | 427    | 0       | 789       | <i>Lactobacillus nenjiangensis</i>  |
| 1151 | seq_231 | gi 645319700 ref NR_117065.1  | 100        | 427    | 0       | 789       | <i>Lactobacillus ultunensis</i>     |
| 1506 | seq_302 | gi 1491505234 ref NR_159082.1 | 99.766     | 427    | 0       | 784       | <i>Lactobacillus allii</i>          |

|      |         |                               |        |     |   |     |                                        |
|------|---------|-------------------------------|--------|-----|---|-----|----------------------------------------|
| 1676 | seq_336 | gi 631253167 ref NR_114365.1  | 99.063 | 427 | 0 | 767 | <i>Lactobacillus iwatensis</i>         |
| 1761 | seq_353 | gi 343198639 ref NR_043148.1  | 100    | 427 | 0 | 789 | <i>Lactobacillus oligofermentans</i>   |
| 1816 | seq_364 | gi 631253053 ref NR_114251.1  | 98.829 | 427 | 0 | 761 | <i>Lactobacillus senmaizukei</i>       |
| 2006 | seq_402 | gi 1199303358 ref NR_147709.1 | 98.829 | 427 | 0 | 761 | <i>Lactobacillus wasatchensis</i>      |
| 21   | seq_005 | gi 959494902 ref NR_133769.1  | 100    | 427 | 0 | 789 | <i>Leuconostoc gelidum</i>             |
| 2001 | seq_401 | gi 959494902 ref NR_133769.1  | 99.766 | 427 | 0 | 784 |                                        |
| 1591 | seq_319 | gi 959494902 ref NR_133769.1  | 98.656 | 372 | 0 | 660 |                                        |
| 61   | seq_013 | gi 1269801505 ref NR_074997.2 | 100    | 427 | 0 | 789 |                                        |
| 101  | seq_021 | gi 1441204190 ref NR_157602.1 | 100    | 427 | 0 | 789 | <i>Leuconostoc mesenteroides</i>       |
| 791  | seq_159 | gi 631250774 ref NR_109004.1  | 99.766 | 427 | 0 | 784 | <i>Leuconostoc pseudomesenteroides</i> |
| 166  | seq_034 | gi 343200124 ref NR_040811.1  | 100    | 427 | 0 | 789 | <i>Leuconostoc carnosum</i>            |
| 1011 | seq_203 | gi 343202334 ref NR_042620.1  | 100    | 427 | 0 | 789 | <i>Leuconostoc holzapfelii</i>         |
| 1786 | seq_358 | gi 631252057 ref NR_113255.1  | 100    | 427 | 0 | 789 | <i>Leuconostoc lactis</i>              |
| 26   | seq_006 | gi 566085118 ref NR_108858.1  | 99.061 | 426 | 0 | 765 | <i>Weissella fabalis</i>               |
| 146  | seq_030 | gi 566085118 ref NR_108858.1  | 98.826 | 426 | 0 | 760 |                                        |
| 316  | seq_064 | gi 566085118 ref NR_108858.1  | 98.826 | 426 | 0 | 760 |                                        |
| 321  | seq_065 | gi 566085118 ref NR_108858.1  | 98.826 | 426 | 0 | 760 |                                        |
| 1886 | seq_378 | gi 566085118 ref NR_108858.1  | 99.061 | 426 | 0 | 765 |                                        |
| 96   | seq_020 | gi 265678736 ref NR_029041.1  | 100    | 427 | 0 | 789 | <i>Weissella koreensis</i>             |
| 236  | seq_048 | gi 265678736 ref NR_029041.1  | 99.766 | 427 | 0 | 784 |                                        |
| 296  | seq_060 | gi 265678736 ref NR_029041.1  | 99.766 | 427 | 0 | 784 |                                        |
| 832  | seq_167 | gi 310975060 ref NR_036924.1  | 100    | 427 | 0 | 789 | <i>Weissella cibaria</i>               |
| 191  | seq_039 | gi 631252761 ref NR_113959.1  | 100    | 427 | 0 | 789 | <i>Lactococcus raffinolactis</i>       |
| 516  | seq_104 | gi 631252761 ref NR_113959.1  | 99.766 | 427 | 0 | 784 |                                        |
| 901  | seq_181 | gi 631252761 ref NR_113959.1  | 99.766 | 427 | 0 | 784 |                                        |
| 273  | seq_055 | gi 631252762 ref NR_113960.1  | 100    | 427 | 0 | 789 | <i>Lactococcus lactis</i>              |
| 358  | seq_072 | gi 631252070 ref NR_113268.1  | 100    | 427 | 0 | 789 | <i>Lactococcus garvieae</i>            |
| 76   | seq_016 | gi 343204087 ref NR_043739.1  | 100    | 427 | 0 | 789 | <i>Lactococcus piscium</i>             |
| 156  | seq_032 | gi 631252600 ref NR_113798.1  | 100    | 427 | 0 | 789 | <i>Carnobacterium divergens</i>        |
| 696  | seq_140 | gi 343201367 ref NR_042093.1  | 99.532 | 427 | 0 | 780 | <i>Carnobacterium gallinarum</i>       |
| 991  | seq_199 | gi 636560400 ref NR_116460.1  | 100    | 427 | 0 | 789 | <i>Carnobacterium jeotgali</i>         |
| 126  | seq_026 | gi 631252389 ref NR_113587.1  | 100    | 427 | 0 | 789 | <i>Brochothrix thermosphacta</i>       |
| 176  | seq_036 | gi 631252148 ref NR_113346.1  | 98.135 | 429 | 0 | 747 | <i>Acinetobacter lwoffii</i>           |
| 291  | seq_059 | gi 631252148 ref NR_113346.1  | 97.902 | 429 | 0 | 741 |                                        |
| 1346 | seq_270 | gi 631252148 ref NR_113346.1  | 100    | 428 | 0 | 791 |                                        |
| 326  | seq_066 | gi 645320413 ref NR_117624.1  | 99.065 | 428 | 0 | 769 | <i>Acinetobacter johnsonii</i>         |
| 456  | seq_092 | gi 645320413 ref NR_117624.1  | 99.533 | 428 | 0 | 780 |                                        |
| 566  | seq_114 | gi 645320413 ref NR_117624.1  | 99.766 | 428 | 0 | 785 |                                        |

|      |         |                               |        |     |   |     |                                      |
|------|---------|-------------------------------|--------|-----|---|-----|--------------------------------------|
| 586  | seq_118 | gi 645320413 ref NR_117624.1  | 99.766 | 428 | 0 | 785 |                                      |
| 916  | seq_184 | gi 645320413 ref NR_117624.1  | 99.533 | 428 | 0 | 780 |                                      |
| 921  | seq_185 | gi 645320413 ref NR_117624.1  | 99.065 | 428 | 0 | 769 |                                      |
| 986  | seq_198 | gi 645320413 ref NR_117624.1  | 99.766 | 428 | 0 | 785 |                                      |
| 1051 | seq_211 | gi 645320413 ref NR_117624.1  | 99.533 | 428 | 0 | 780 |                                      |
| 1071 | seq_215 | gi 645320413 ref NR_117624.1  | 98.832 | 428 | 0 | 763 |                                      |
| 751  | seq_151 | gi 1341394069 ref NR_153741.1 | 99.533 | 428 | 0 | 780 | <i>Acinetobacter celticus</i>        |
| 1701 | seq_341 | gi 1341394069 ref NR_153741.1 | 98.832 | 428 | 0 | 763 |                                      |
| 846  | seq_170 | gi 645320481 ref NR_117677.1  | 97.436 | 429 | 0 | 730 | <i>Acinetobacter baumannii</i>       |
| 1741 | seq_349 | gi 645320481 ref NR_117677.1  | 97.669 | 429 | 0 | 736 |                                      |
| 651  | seq_131 | gi 961554986 ref NR_133953.1  | 97.902 | 429 | 0 | 741 |                                      |
| 1386 | seq_278 | gi 961554986 ref NR_133953.1  | 100    | 428 | 0 | 791 | <i>Acinetobacter gandensis</i>       |
| 1566 | seq_314 | gi 961554986 ref NR_133953.1  | 98.14  | 429 | 0 | 747 |                                      |
| 976  | seq_196 | gi 1137647852 ref NR_145641.1 | 99.533 | 428 | 0 | 780 | <i>Acinetobacter albensis</i>        |
| 1276 | seq_256 | gi 1137647852 ref NR_145641.1 | 98.598 | 428 | 0 | 758 |                                      |
| 806  | seq_162 | gi 1146059109 ref NR_145841.1 | 99.766 | 428 | 0 | 785 | <i>Acinetobacter movanagherensis</i> |
| 891  | seq_179 | gi 1146059109 ref NR_145841.1 | 98.364 | 428 | 0 | 752 |                                      |
| 941  | seq_189 | gi 645320415 ref NR_117626.1  | 100    | 428 | 0 | 791 | <i>Acinetobacter guillouiae</i>      |
| 1261 | seq_253 | gi 645320419 ref NR_117629.1  | 99.533 | 428 | 0 | 780 | <i>Acinetobacter tjernbergiae</i>    |
| 1296 | seq_260 | gi 1230874683 ref NR_148844.1 | 97.196 | 428 | 0 | 725 | <i>Acinetobacter dispersus</i>       |
| 1356 | seq_272 | gi 1397641879 ref NR_156989.1 | 98.832 | 428 | 0 | 763 | <i>Acinetobacter defluvii</i>        |
| 691  | seq_139 | gi 1277396356 ref NR_152069.1 | 98.598 | 428 | 0 | 758 | <i>Acinetobacter pragensis</i>       |

---

**Table S3.** The list of total samples of culturable bacterial communities.

| Coded name                | Species name                                    | Closest accession number      |
|---------------------------|-------------------------------------------------|-------------------------------|
| <b>Intestine</b>          |                                                 |                               |
| C1                        | <i>Enterococcus faecium</i>                     | NR 115764                     |
| C2                        | <i>Enterococcus faecium</i>                     | NR 115764                     |
| C3                        | <i>Enterococcus durans</i>                      | NR 113900                     |
| C4                        | <i>Enterococcus durans</i>                      | NR 113900                     |
| C5                        | <i>Lactobacillus sakei</i>                      | NR 113821                     |
| haC1                      | <i>Enterococcus hirae</i>                       | NR 114783                     |
| haC3                      | <i>Enterococcus faecium</i>                     | NR 115764                     |
| haC8                      | <i>Bacillus toyonensis/wiedmannii/sanguinis</i> | NR 121761/NR 152692/NR 175555 |
| <b>0 day</b>              |                                                 |                               |
| 0/1                       | <i>Leuconostoc mesenteroides</i>                | NR 074957                     |
| 0/2                       | <i>Leuconostoc mesenteroides</i>                | NR 074957                     |
| 0/5                       | <i>Leuconostoc mesenteroides</i>                | NR 074957                     |
| 0/6                       | <i>Leuconostoc mesenteroides</i>                | NR 074957                     |
| 0/7                       | <i>Leuconostoc mesenteroides</i>                | NR 074957                     |
| 0/8                       | <i>Leuconostoc mesenteroides</i>                | NR 074957                     |
| 0/9                       | <i>Leuconostoc mesenteroides</i>                | NR 074957                     |
| 0/10                      | <i>Leuconostoc mesenteroides</i>                | NR 074957                     |
| 0/11                      | <i>Leuconostoc mesenteroides</i>                | NR 074957                     |
| 0/12                      | <i>Leuconostoc mesenteroides</i>                | NR 074957                     |
| 0/13                      | <i>Leuconostoc mesenteroides</i>                | NR 074957                     |
| 0/14                      | <i>Leuconostoc mesenteroides</i>                | NR 074957                     |
| 0/15                      | <i>Leuconostoc mesenteroides</i>                | NR 074957                     |
| 0/16                      | <i>Leuconostoc mesenteroides</i>                | NR 074957                     |
| 0/17                      | <i>Leuconostoc mesenteroides</i>                | NR 074957                     |
| 0/18                      | <i>Leuconostoc mesenteroides</i>                | NR 074957                     |
| 0/19                      | <i>Leuconostoc mesenteroides</i>                | NR 074957                     |
| 0/20                      | <i>Leuconostoc mesenteroides</i>                | NR 074957                     |
| 0/21                      | <i>Leuconostoc mesenteroides</i>                | NR 074957                     |
| 0/22                      | <i>Leuconostoc mesenteroides</i>                | NR 074957                     |
| ha0/0                     | <i>Lactobacillus sakei</i>                      | NR 113821                     |
| ha0/1                     | <i>Bacillus tropicus/paramycoides/luti</i>      | NR 157736/NR 157734/NR 157730 |
| ha0/2                     | <i>Marichromatium purpuratum</i>                | NR 116469                     |
| ha0/3                     | <i>Bacillus toyonensis/wiedmannii/sanguinis</i> | NR 121761/NR 152692/NR 175555 |
| ha0/10                    | <i>Enterococcus faecium</i>                     | NR 115764                     |
| ha0/12                    | <i>Bacillus tropicus/paramycoides/luti</i>      | NR 157736/NR 157734/NR 157730 |
| ha0/13                    | <i>Macroccoccus caseolyticus</i>                | NR 119262                     |
| ha0/20                    | <i>Corynebacterium lipophiloflavum</i>          | NR 026370                     |
| <b>2<sup>nd</sup> day</b> |                                                 |                               |
| 2/1                       | <i>Leuconostoc mesenteroides</i>                | NR 074957                     |
| 2/2                       | <i>Leuconostoc mesenteroides</i>                | NR 074957                     |

|                     |                                  |           |
|---------------------|----------------------------------|-----------|
| 2/3                 | <i>Leuconostoc mesenteroides</i> | NR 074957 |
| 2/5                 | <i>Leuconostoc mesenteroides</i> | NR 074957 |
| 2/7                 | <i>Leuconostoc mesenteroides</i> | NR 074957 |
| 2/8                 | <i>Leuconostoc mesenteroides</i> | NR 074957 |
| 2/9                 | <i>Leuconostoc mesenteroides</i> | NR 074957 |
| 2/10                | <i>Leuconostoc mesenteroides</i> | NR 074957 |
| 2/11                | <i>Leuconostoc mesenteroides</i> | NR 074957 |
| 2/12                | <i>Leuconostoc mesenteroides</i> | NR 074957 |
| 2/13                | <i>Leuconostoc mesenteroides</i> | NR 074957 |
| 2/15                | <i>Leuconostoc mesenteroides</i> | NR 074957 |
| 2/16                | <i>Leuconostoc mesenteroides</i> | NR 074957 |
| 2/17                | <i>Leuconostoc mesenteroides</i> | NR 074957 |
| 2/18                | <i>Leuconostoc mesenteroides</i> | NR 074957 |
| 2/19                | <i>Leuconostoc mesenteroides</i> | NR 074957 |
| 2/20                | <i>Leuconostoc mesenteroides</i> | NR 074957 |
| ha2/1               | <i>Lactobacillus sakei</i>       | NR 113821 |
| ha2/2               | <i>Serratia proteamaculans</i>   | NR 025341 |
| ha2/4               | <i>Hafnia alvei</i>              | NR 044729 |
| ha2/7               | <i>Hafnia paralvei</i>           | NR 116898 |
| ha2/9               | <i>Carnobacterium divergens</i>  | NR 113798 |
| ha2/10              | <i>Serratia proteamaculans</i>   | NR 025341 |
| ha2/13              | <i>Bacillus licheniformis</i>    | NR 118996 |
| ha2/17              | <i>Macrococcus canis</i>         | NR 156154 |
| ha2/20              | <i>Pectobacterium wasabiae</i>   | NR 118294 |
| <hr/>               |                                  |           |
| 7 <sup>th</sup> day |                                  |           |
| 7/1                 | <i>Leuconostoc mesenteroides</i> | NR 074957 |
| 7/2                 | <i>Leuconostoc mesenteroides</i> | NR 074957 |
| 7/3                 | <i>Leuconostoc mesenteroides</i> | NR 074957 |
| 7/4                 | <i>Leuconostoc mesenteroides</i> | NR 074957 |
| 7/5                 | <i>Leuconostoc mesenteroides</i> | NR 074957 |
| 7/6                 | <i>Leuconostoc mesenteroides</i> | NR 074957 |
| 7/7                 | <i>Leuconostoc mesenteroides</i> | NR 074957 |
| 7/8                 | <i>Leuconostoc mesenteroides</i> | NR 074957 |
| 7/9                 | <i>Leuconostoc mesenteroides</i> | NR 074957 |
| 7/10                | <i>Leuconostoc mesenteroides</i> | NR 074957 |
| 7/11                | <i>Leuconostoc mesenteroides</i> | NR 074957 |
| 7/12                | <i>Leuconostoc mesenteroides</i> | NR 074957 |
| 7/14                | <i>Weissella cibaria</i>         | NR 036924 |
| 7/15                | <i>Leuconostoc mesenteroides</i> | NR 074957 |
| 7/16                | <i>Leuconostoc mesenteroides</i> | NR 074957 |
| 7/17                | <i>Leuconostoc mesenteroides</i> | NR 074957 |
| 7/18                | <i>Leuconostoc mesenteroides</i> | NR 074957 |
| 7/19                | <i>Leuconostoc mesenteroides</i> | NR 074957 |



|        |                                                                                                                  |                               |
|--------|------------------------------------------------------------------------------------------------------------------|-------------------------------|
| 7/20   | <i>Leuconostoc mesenteroides</i>                                                                                 | NR 074957                     |
| ha7/0  | <i>Lactobacillus sakei</i>                                                                                       | NR 113821                     |
| ha7/3  | <i>Citrobacter murlinae</i>                                                                                      | NR 028688                     |
| ha7/7  | <i>Pantoea agglomerans</i> / <i>Enterobacter ludwigii</i> / <i>Enterobacter cloacae</i> subsp. <i>dissolvens</i> | NR 111998/NR 042349/NR 118011 |
| ha7/8  | <i>Enterococcus pallens</i>                                                                                      | NR 043794                     |
| ha7/10 | <i>Lactococcus lactis</i> subsp. <i>hordniae</i>                                                                 | NR 113958                     |
| ha7/11 | <i>Enterobacter aerogenes</i>                                                                                    | NR 113614                     |
| ha7/13 | <i>Macrococcus canis</i>                                                                                         | NR 156154                     |
| ha7/15 | <i>Kocuria kristinae</i>                                                                                         | NR 026199                     |
| ha7/20 | <i>Pantoea agglomerans</i> / <i>Enterobacter ludwigii</i> / <i>Enterobacter cloacae</i> subsp. <i>dissolvens</i> | NR 111998/NR 042349/NR 118011 |

#### 10<sup>th</sup> day

|         |                                                   |           |
|---------|---------------------------------------------------|-----------|
| 10/1    | <i>Leuconostoc mesenteroides</i>                  | NR 074957 |
| 10/4    | <i>Leuconostoc mesenteroides</i>                  | NR 074957 |
| 10/6    | <i>Leuconostoc mesenteroides</i>                  | NR 074957 |
| 10/7    | <i>Leuconostoc mesenteroides</i>                  | NR 074957 |
| 10/8    | <i>Leuconostoc mesenteroides</i>                  | NR 074957 |
| 10/9    | <i>Leuconostoc mesenteroides</i>                  | NR 074957 |
| 10/10   | <i>Leuconostoc mesenteroides</i>                  | NR 074957 |
| 10/11   | <i>Leuconostoc mesenteroides</i>                  | NR 074957 |
| 10/12   | <i>Leuconostoc mesenteroides</i>                  | NR 074957 |
| 10/13   | <i>Leuconostoc mesenteroides</i>                  | NR 074957 |
| 10/14   | <i>Leuconostoc mesenteroides</i>                  | NR 074957 |
| 10/15   | <i>Leuconostoc mesenteroides</i>                  | NR 074957 |
| 10/16   | <i>Leuconostoc mesenteroides</i>                  | NR 074957 |
| 10/17   | <i>Leuconostoc mesenteroides</i>                  | NR 074957 |
| 10/18   | <i>Leuconostoc mesenteroides</i>                  | NR 074957 |
| ha10/1  | <i>Enterococcus faecium</i>                       | NR 115764 |
| ha10/3  | <i>Lactobacillus sakei</i>                        | NR 113821 |
| ha10/4  | <i>Leuconostoc mesenteroides</i>                  | NR 074957 |
| ha10/6  | <i>Enterococcus faecium</i>                       | NR 115764 |
| ha10/7  | <i>Carnobacterium divergens</i>                   | NR 113798 |
| ha10/8  | <i>Enterococcus casseliflavus</i>                 | NR 104560 |
| ha10/11 | <i>Moraxella osloensis</i>                        | NR 113392 |
| ha10/13 | <i>Carnobacterium maltaromaticum</i>              | NR 044710 |
| ha10/15 | <i>Lactobacillus sakei</i> subsp. <i>carnosus</i> | NR 104208 |

#### 14<sup>th</sup> day

|       |                                        |           |
|-------|----------------------------------------|-----------|
| 14/3  | <i>Leuconostoc mesenteroides</i>       | NR 074957 |
| 14/4  | <i>Leuconostoc pseudomesenteroides</i> | NR 040814 |
| 14/5  | <i>Leuconostoc mesenteroides</i>       | NR 074957 |
| 14/6  | <i>Leuconostoc mesenteroides</i>       | NR 074957 |
| 14/7  | <i>Leuconostoc mesenteroides</i>       | NR 074957 |
| 14/9  | <i>Leuconostoc mesenteroides</i>       | NR 074957 |
| 14/10 | <i>Leuconostoc mesenteroides</i>       | NR 074957 |

|         |                                  |           |
|---------|----------------------------------|-----------|
| 14/11   | <i>Leuconostoc mesenteroides</i> | NR 074957 |
| 14/12   | <i>Leuconostoc mesenteroides</i> | NR 074957 |
| 14/13   | <i>Leuconostoc mesenteroides</i> | NR 074957 |
| 14/14   | <i>Leuconostoc mesenteroides</i> | NR 074957 |
| 14/16   | <i>Leuconostoc mesenteroides</i> | NR 074957 |
| 14/17   | <i>Leuconostoc mesenteroides</i> | NR 074957 |
| 14/18   | <i>Leuconostoc mesenteroides</i> | NR 074957 |
| ha14/1  | <i>Lactobacillus sakei</i>       | NR 113821 |
| ha14/2  | <i>Lactobacillus sakei</i>       | NR 113821 |
| ha14/3  | <i>Carnobacterium divergens</i>  | NR 113798 |
| ha14/4  | <i>Shigella sonney</i>           | NR 104826 |
| ha14/7  | <i>Enterococcus faecium</i>      | NR 115764 |
| ha14/10 | <i>Lactococcus garvieae</i>      | NR 113268 |

---

**21<sup>st</sup> day**

---

|            |                                                 |                               |
|------------|-------------------------------------------------|-------------------------------|
| 21/1       | <i>Leuconostoc mesenteroides</i>                | NR 074957                     |
| 21/2       | <i>Leuconostoc mesenteroides</i>                | NR 074957                     |
| 21/3       | <i>Leuconostoc mesenteroides</i>                | NR 074957                     |
| 21/4       | <i>Leuconostoc mesenteroides</i>                | NR 074957                     |
| 21/5       | <i>Leuconostoc mesenteroides</i>                | NR 074957                     |
| 21/6       | <i>Leuconostoc rapi</i>                         | NR 136799                     |
| 21/7       | <i>Leuconostoc mesenteroides</i>                | NR 074957                     |
| 21/8       | <i>Leuconostoc mesenteroides</i>                | NR 074957                     |
| 21/10      | <i>Leuconostoc mesenteroides</i>                | NR 074957                     |
| 21/11      | <i>Leuconostoc mesenteroides</i>                | NR 074957                     |
| 21/13      | <i>Leuconostoc mesenteroides</i>                | NR 074957                     |
| 21/14      | <i>Lactococcus garvieae</i>                     | NR 113268                     |
| 21/15      | <i>Leuconostoc mesenteroides</i>                | NR 074957                     |
| 21/16      | <i>Leuconostoc mesenteroides</i>                | NR 074957                     |
| 21/17      | <i>Leuconostoc mesenteroides</i>                | NR 074957                     |
| ha21/1     | <i>Lactobacillus sakei</i>                      | NR 113821                     |
| ha21/4     | <i>Bacillus tropicus/paramycoides/luti</i>      | NR 157736/NR 157734/NR 157730 |
| ha21/5     | <i>Lactobacillus sakei</i>                      | NR 113821                     |
| ha21/6     | <i>Lactobacillus sakei</i>                      | NR 113821                     |
| ha21/7 (1) | <i>Bacillus toyonensis/wiedmannii/sanguinis</i> | NR 121761/NR 152692/NR 175555 |
| ha21/7 (2) | <i>Bacillus toyonensis/wiedmannii/sanguinis</i> | NR 121761/NR 152692/NR 175555 |
| ha21/11    | <i>Lactobacillus sakei</i>                      | NR 113821                     |
| ha21/14    | <i>Lactobacillus sakei</i>                      | NR 113821                     |

---

\*the coded names without prefixes represent isolates grown on MRS medium

**Table S4.** Physical-chemical and technological parameters as the mean differences of statistical significance throughout the ripening of “Pirrot ‘ironed’ sausage”.

| Dependent Variable | (I) Ripening         | (J) Ripening         | Mean Difference (I-J) | Sig.  | Dependent Variable | (I) Ripening         | (J) Ripening         | Mean Difference (I-J) | Sig.  | Dependent Variable | (I) Ripening         | (J) Ripening         | Mean Difference (I-J) | Sig.  |
|--------------------|----------------------|----------------------|-----------------------|-------|--------------------|----------------------|----------------------|-----------------------|-------|--------------------|----------------------|----------------------|-----------------------|-------|
| pH                 | 0 day                | 7 <sup>th</sup> day  | 0.08111*              | 0.040 | L*                 | 0 day                | 7 <sup>th</sup> day  | 3.72333               | 0.451 | L*                 | 0 day                | 7 <sup>th</sup> day  | -0.23667              | 0.999 |
|                    |                      | 14 <sup>th</sup> day | 0.10333*              | 0.009 |                    |                      | 14 <sup>th</sup> day | 11.91333*             | 0.002 |                    |                      | 14 <sup>th</sup> day | 0.89667               | 0.877 |
|                    |                      | 21 <sup>st</sup> day | 0.21333*              | 0.000 |                    |                      | 21 <sup>st</sup> day | 10.58000*             | 0.004 |                    |                      | 21 <sup>st</sup> day | 1.21667               | 0.714 |
|                    |                      | 28 <sup>th</sup> day | 0.49333*              | 0.000 |                    |                      | 28 <sup>th</sup> day | 8.33000*              | 0.019 |                    |                      | 28 <sup>th</sup> day | 3.02667               | 0.061 |
|                    | 7 <sup>th</sup> day  | 14 <sup>th</sup> day | 0.02222               | 0.874 |                    | 7 <sup>th</sup> day  | 14 <sup>th</sup> day | 8.19000*              | 0.021 |                    | 7 <sup>th</sup> day  | 14 <sup>th</sup> day | 1.13333               | 0.761 |
|                    |                      | 21 <sup>st</sup> day | 0.13222*              | 0.002 |                    |                      | 21 <sup>st</sup> day | 6.85667               | 0.056 |                    |                      | 21 <sup>st</sup> day | 1.45333               | 0.575 |
|                    |                      | 28 <sup>th</sup> day | 0.41222*              | 0.000 |                    |                      | 28 <sup>th</sup> day | 4.60667               | 0.269 |                    |                      | 28 <sup>th</sup> day | 3.26333*              | 0.042 |
|                    | 14 <sup>th</sup> day | 21 <sup>st</sup> day | 0.11000*              | 0.006 |                    | 14 <sup>th</sup> day | 21 <sup>st</sup> day | -1.33333              | 0.968 |                    | 14 <sup>th</sup> day | 21 <sup>st</sup> day | 0.32                  | 0.997 |
|                    |                      | 28 <sup>th</sup> day | 0.39000*              | 0.000 |                    |                      | 28 <sup>th</sup> day | -3.58333              | 0.486 |                    |                      | 28 <sup>th</sup> day | 2.13                  | 0.247 |
|                    | 21 <sup>st</sup> day | 28 <sup>th</sup> day | 0.28000*              | 0.000 |                    | 21 <sup>st</sup> day | 28 <sup>th</sup> day | -2.25                 | 0.825 |                    | 21 <sup>st</sup> day | 28 <sup>th</sup> day | 1.81                  | 0.381 |
| a <sub>w</sub>     | 0 day                | 7 <sup>th</sup> day  | 0.01144               | 0.132 | a*                 | 0 day                | 7 <sup>th</sup> day  | 2.76667*              | 0.002 | a*                 | 0 day                | 7 <sup>th</sup> day  | -0.28                 | 0.996 |
|                    |                      | 14 <sup>th</sup> day | 0.04667*              | 0.000 |                    |                      | 14 <sup>th</sup> day | 5.08000*              | 0.000 |                    |                      | 14 <sup>th</sup> day | 6.10000*              | 0.000 |
|                    |                      | 21 <sup>st</sup> day | 0.08667*              | 0.000 |                    |                      | 21 <sup>st</sup> day | 6.49667*              | 0.000 |                    |                      | 21 <sup>st</sup> day | 9.15333*              | 0.000 |
|                    |                      | 28 <sup>th</sup> day | 0.11667*              | 0.000 |                    |                      | 28 <sup>th</sup> day | 7.87000*              | 0.000 |                    |                      | 28 <sup>th</sup> day | 12.51667*             | 0.000 |
|                    | 7 <sup>th</sup> day  | 14 <sup>th</sup> day | 0.03522*              | 0.000 |                    | 7 <sup>th</sup> day  | 14 <sup>th</sup> day | 2.31333*              | 0.007 |                    | 7 <sup>th</sup> day  | 14 <sup>th</sup> day | 6.38000*              | 0.000 |
|                    |                      | 21 <sup>st</sup> day | 0.07522*              | 0.000 |                    |                      | 21 <sup>st</sup> day | 3.73000*              | 0.000 |                    |                      | 21 <sup>st</sup> day | 9.43333*              | 0.000 |
|                    |                      | 28 <sup>th</sup> day | 0.10522*              | 0.000 |                    |                      | 28 <sup>th</sup> day | 5.10333*              | 0.000 |                    |                      | 28 <sup>th</sup> day | 12.79667*             | 0.000 |
|                    | 14 <sup>th</sup> day | 21 <sup>st</sup> day | 0.04000*              | 0.000 |                    | 14 <sup>th</sup> day | 21 <sup>st</sup> day | 1.41667               | 0.106 |                    | 14 <sup>th</sup> day | 21 <sup>st</sup> day | 3.05333*              | 0.024 |
|                    |                      | 28 <sup>th</sup> day | 0.07000*              | 0.000 |                    |                      | 28 <sup>th</sup> day | 2.79000*              | 0.002 |                    |                      | 28 <sup>th</sup> day | 6.41667*              | 0.000 |
|                    | 21 <sup>st</sup> day | 28 <sup>th</sup> day | 0.03000*              | 0.000 |                    | 21 <sup>st</sup> day | 28 <sup>th</sup> day | 1.37333               | 0.121 |                    | 21 <sup>st</sup> day | 28 <sup>th</sup> day | 3.36333*              | 0.013 |
| Fat (%)            | 0 day                | 7 <sup>th</sup> day  | -0.27667              | 0.999 | b*                 | 0 day                | 7 <sup>th</sup> day  | 1.59                  | 0.236 | b*                 | 0 day                | 7 <sup>th</sup> day  | 0.49667               | 0.960 |
|                    |                      | 14 <sup>th</sup> day | -2.67                 | 0.138 |                    |                      | 14 <sup>th</sup> day | 2.54000*              | 0.031 |                    |                      | 14 <sup>th</sup> day | 9.99333*              | 0.000 |
|                    |                      | 21 <sup>st</sup> day | -2.72667              | 0.127 |                    |                      | 21 <sup>st</sup> day | 5.08667*              | 0.000 |                    |                      | 21 <sup>st</sup> day | 14.13333*             | 0.000 |
